# Supplementary material for: Molecular marker sequences of cattle Cooperia species identify Cooperia spatulata as a morphotype of Cooperia punctata
Source: PubMed Central journal article supplement (PMC6034896; doi:10.1371/journal.pone.0200390), 2018-07-06
Supplement: pone.0200390.s001.pdf [file pone.0200390.s001.pdf]

**S1 Table****Primer sequences and PCR conditions**

| <b>Target gene</b>                       | <b>Primer name</b> | <b>Sequence 5' -&gt; 3'</b> | <b>T<sub>a</sub><sup>a</sup> (°C)</b> | <b>Et<sup>b</sup> (s.)</b> | <b>Size (bp)<sup>c</sup></b> | <b>References</b>                  |
|------------------------------------------|--------------------|-----------------------------|---------------------------------------|----------------------------|------------------------------|------------------------------------|
| 12S gene                                 | Coop12S_for_kurz   | GTATAATACTTGTTCAGATAATC     | 51                                    | 20                         | ~ 223                        | Designed in this study             |
|                                          | Coop12S_rev_kurz   | CTTACAGTTTAAATACAACCTTAC    |                                       |                            |                              | Designed in this study             |
| Cytochrome oxidase II                    | COII_deg_for       | ATKGARTAYCARTTTGGIGARTT     | 47                                    | 30                         | ~ 452                        | Designed in this study             |
|                                          | COII_deg_rev       | CTRTGRTTIGCICRCARATYTC      |                                       |                            |                              | Designed in this study             |
| Internal transcribed spacer <sup>d</sup> | ITS1_part_for      | TAGGTGAAACCTGCAGATGGAT      | 52                                    | 45                         | ~ 1223                       | Modified from Demeler et al, 2013  |
|                                          | NC2                | TTAGTTTCTTTTCCTCCGCT        |                                       |                            |                              | Gasser et al, 1993                 |
| Partiell $\beta$ -tubulin isotype 1      | CoPCR167fw         | TATGGGCACTTTGCTTATTTCA      | 52                                    | 20                         | ~ 267                        | Demeler et al., 2013               |
|                                          | CoPCR198+200rev    | CCGGACATYGTGACAGACACTAGG    |                                       |                            |                              | Modified from Demeler et al., 2013 |
| <i>Sequencing primer</i>                 | 5.8S Seq_for       | GCAGACGCTTAGAGTGGTG         |                                       |                            |                              | Designed in this study             |
|                                          | 5.8S Seq_rev       | CAGACGTGCCGAAGGGAAAAC       |                                       |                            |                              | Designed in this study             |

<sup>a</sup>Annealing temperature,<sup>b</sup>Extention time<sup>c</sup>Fragmentsize including Primer<sup>d</sup>partiell internal transcribed spacer-1, 5.8S rRNA and complete internal transcribed spacer-2
