# Supplementary material for: Molecular marker sequences of cattle Cooperia species identify Cooperia spatulata as a morphotype of Cooperia punctata
Source: PubMed Central journal article supplement (PMC6034896; doi:10.1371/journal.pone.0200390), 2018-07-06
Supplement: pone.0200390.s002.pdf [file pone.0200390.s002.pdf]

**S2 Table. GenBank accession numbers for all sequences included in the phylogenetic analyses and not provin the figures.**

| <b>Morphospecies</b> | <b>Country (Isolate)</b> | <b>Isolate/Voucher</b> | <b>12S rRNA</b> | <b>ITS-1/ITS-2</b> | <b>Cytochrome oxidase II</b> | <b>β-tubulin isotype 1</b> |
|----------------------|--------------------------|------------------------|-----------------|--------------------|------------------------------|----------------------------|
| <i>C. oncophora</i>  | UK                       | Weybridge C1           | MH270705        | MH267770           | MH290287                     | MH290336                   |
| <i>C. oncophora</i>  | UK                       | Weybridge C2           | MH270704        | MH267771           | MH290288                     | MH290335                   |
| <i>C. oncophora</i>  | UK                       | IVMres C3              | MH270703        | MH267772           | MH290289                     | MH290334                   |
| <i>C. oncophora</i>  | UK                       | IVMres C4              | MH270702        | MH267773           | MH290290                     | MH290333                   |
| <i>C. oncophora</i>  | NZ                       | NZres C5               | MH270701        | MH267774           | MH290291                     | MH290332                   |
| <i>C. pectinata</i>  | Brazil                   | P21                    | MH270690        | MH267780           | MH290292                     | MH290326                   |
| <i>C. pectinata</i>  | Brazil                   | P22                    | MH270689        | MH267781           | MH290293                     | MH290325                   |
| <i>C. pectinata</i>  | Brazil                   | P23                    | MH270688        | MH267782           | MH290294                     | MH290324                   |
| <i>C. pectinata</i>  | Brazil                   | P24                    | n.a.            | MH267783           | MH290295                     | MH290323                   |
| <i>C. pectinata</i>  | Brazil                   | P25                    | MH270687        | MH267784           | MH290296                     | MH290322                   |
| <i>C. pectinata</i>  | Brazil                   | P31                    | MH270686        | MH267785           | n.a.                         | MH290321                   |
| <i>C. pectinata</i>  | Brazil                   | P32                    | MH270685        | n.a.               | n.a.                         | MH290320                   |
| <i>C. pectinata</i>  | Brazil                   | P33                    | MH270684        | n.a.               | MH290297                     | MH290319                   |
| <i>C. punctata</i>   | Mexico                   | M1                     | MH270700        | n.a.               | n.a.                         | n.a.                       |
| <i>C. punctata</i>   | Mexico                   | M11                    | MH270699        | MH267775           | MH290298                     | MH290331                   |
| <i>C. punctata</i>   | Mexico                   | M12                    | MH270698        | MH267776           | MH290299                     | MH290330                   |
| <i>C. punctata</i>   | Mexico                   | M13                    | MH270697        | MH267777           | MH290300                     | MH290329                   |
| <i>C. punctata</i>   | Mexico                   | M14                    | MH270696        | MH267778           | MH290301                     | MH290328                   |
| <i>C. punctata</i>   | Mexico                   | M15                    | MH270695        | MH267779           | MH290302                     | MH290327                   |
| <i>C. punctata</i>   | Mexico                   | M2                     | MH270694        | n.a.               | n.a.                         | n.a.                       |
| <i>C. punctata</i>   | Mexico                   | M3                     | MH270693        | n.a.               | n.a.                         | n.a.                       |
| <i>C. punctata</i>   | Mexico                   | M4                     | MH270692        | n.a.               | n.a.                         | n.a.                       |
| <i>C. punctata</i>   | Mexico                   | M5                     | MH270691        | n.a.               | n.a.                         | n.a.                       |
| <i>C. punctata</i>   | Brazil                   | B21                    | MH270711        | MH267765           | MH290305                     | MH290342                   |
| <i>C. punctata</i>   | Brazil                   | B22                    | MH270710        | MH267766           | n.a.                         | MH290341                   |
| <i>C. punctata</i>   | Brazil                   | B23                    | n.a.            | n.a.               | MH290306                     | MH290340                   |
| <i>C. punctata</i>   | Brazil                   | B24                    | MH270709        | MH267767           | MH290307                     | MH290339                   |
| <i>C. punctata</i>   | Brazil                   | B25                    | MH270708        | MH267768           | MH290303                     | MH290338                   |
| <i>C. punctata</i>   | Brazil                   | B31                    | MH270706        | n.a.               | n.a.                         | n.a.                       |
| <i>C. punctata</i>   | Brazil                   | B33                    | MH270707        | MH267769           | MH290304                     | MH290337                   |
| <i>C. spatulata</i>  | Brazil                   | S21                    | MH270683        | MH267786           | MH290308                     | MH290318                   |
| <i>C. spatulata</i>  | Brazil                   | S22                    | MH270682        | MH267787           | MH290309                     | MH290317                   |
| <i>C. spatulata</i>  | Brazil                   | S23                    | MH270681        | MH267788           | MH290311                     | MH290316                   |
| <i>C. spatulata</i>  | Brazil                   | S24                    | MH270680        | MH267789           | MH290310                     | MH290315                   |
| <i>C. spatulata</i>  | Brazil                   | S31                    | MH270678        | MH267790           | MH290312                     | MH290314                   |
| <i>C. spatulata</i>  | Brazil                   | S31                    | n.a.            | n.a.               | MH290313                     | n.a.                       |
| <i>C. spatulata</i>  | Brazil                   | S32                    | MH270679        | MH267791           | n.a.                         | n.a.                       |

n.a., not available.

UK, United Kingdom

NZ, New Zealand
