# Supplementary material for: Molecular marker sequences of cattle Cooperia species identify Cooperia spatulata as a morphotype of Cooperia punctata
Source: PubMed Central journal article supplement (PMC6034896; doi:10.1371/journal.pone.0200390), 2018-07-06

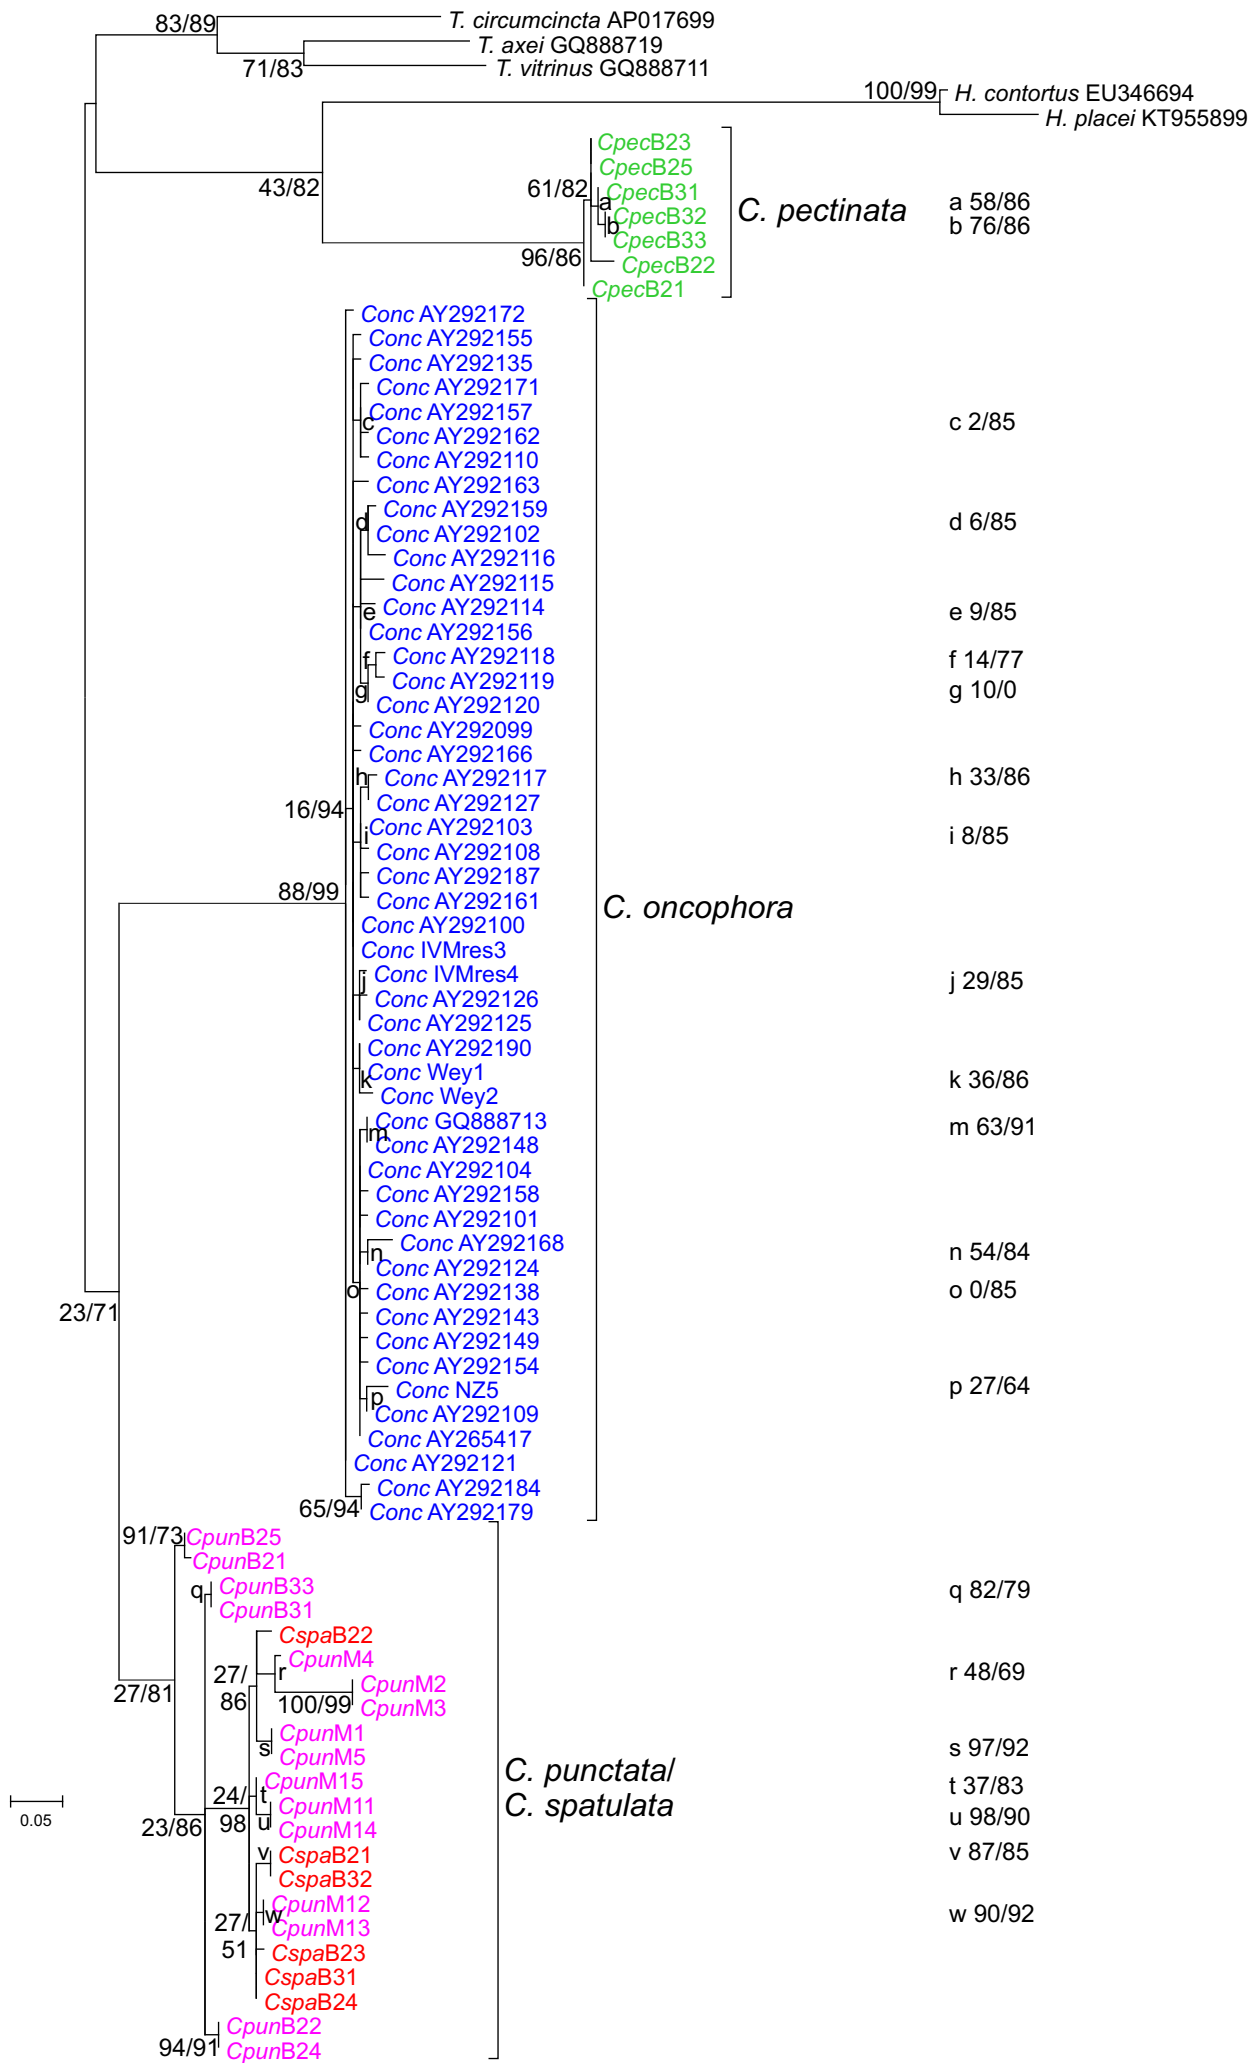

Supplement: pone.0200390.s005.pdf [file pone.0200390.s005.pdf]
